# Supplementary material for: The Amsterdam Studies of Acute Psychiatry I (ASAP-I); A prospective cohort study of determinants and outcome of coercive versus voluntary treatment interventions in a metropolitan area
Source: PubMed Central journal article supplement (PMC2413231; doi:10.1186/1471-244x-8-35), 2008-05-14
Supplement: 1471-244X-8-35-S1.pdf [file 1471-244X-8-35-S1.pdf]

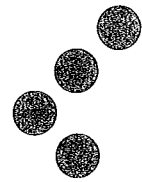

Aan Metrum  
t.a.v. dr. R.A. Schoevers  
2<sup>e</sup> Constantijn Huygensstraat 27  
1054 AG Amsterdam

kenmerk : ST2137.Me  
datum : 21 maart 2007  
betreft : subsidieaanvraag

Geachte heer Schoevers,

In vervolg op de correspondentie in de afgelopen periode omtrent uw subsidieaanvraag "De betekenis van de dwangopname voor het behandelbeloop. Een onderzoek in de Spoedeisende Psychiatrie in Amsterdam" heeft het bestuur besloten uw aanvraag te honoreren..

Het toegekende subsidiebedrag, ad € 80.000, wordt in drie gedeelten uitbetaald, te weten 40% bij aanvang, 30% bij de eerste tussen rapportage en 30% bij de eindrapportage.

Graag vernemen wij op welk rekeningnummer, onder welke vermelding, wij de subsidie kunnen overmaken

Met vriendelijke groet,



drs. F.A.M. Meuwese
