# Supplementary material for: The Amsterdam Studies of Acute Psychiatry I (ASAP-I); A prospective cohort study of determinants and outcome of coercive versus voluntary treatment interventions in a metropolitan area
Source: PubMed Central journal article supplement (PMC2413231; doi:10.1186/1471-244x-8-35), 2008-05-14
Supplement: 1471-244X-8-35-S2.pdf [file 1471-244X-8-35-S2.pdf]

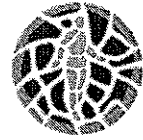

**Mentrum**

Amsterdam, 17-05-2004

Geachte Professor Dekker,  
Hoofd Onderzoek

Professor Klinische Psychologie VU

Betreft: De kans op een IBS opname in Amsterdam. Een onderzoek naar variabelen die de kans op een opname met Inbewaringstelling beïnvloeden

Bij deze deel ik u mede dat voor uw afdeling voor het crisisdienst onderzoek 'De kans op een IBS opname in Amsterdam. Een onderzoek naar variabelen die de kans op een opname met Inbewaringstelling beïnvloeden' vanuit Mentrum een bedrag van €250.000 euro in de komende jaren is gereserveerd.

Met hoogachting,



drs. Diana Monissen  
Mentrum, Raad van Bestuur
